# Supplementary material for: Underwater Image Processing and Target Detection from Particle Swarm Optimization Algorithm
Source: Research Square preprint supplement (doi:10.21203/rs.3.rs-3331423/v1), 2023-09-18
Supplement: Supplementary file 1 [file 3d4a2535fe18ea9a7886d79d.xlsx]

## Sheet: Sheet1
Figure. 7a
Types of algorithms	F value	Accuracy
CA	0.599	0.632
HC	0.769	0.783
GR	0.806	0.824
SR	0.777	0.792
The proposed algorithm	0.843	0.923
Figure. 7b
Types of algorithms	MAE	Recall
CA	0.223	0.532
HC	0.23	0.653
GR	0.217	0.694
SR	0.271	0.593
The proposed algorithm	0.166	0.732
Figure. 8a
Image two-dimensional entropy	Original	DCP	UDCP	The proposed algorithm
1	9.0499	9.4434	9.789	10.885
2	9.0554	9.2938	10.7861	10.6195
3	9.2818	9.5743	9.5438	9.8634
4	9.9542	9.9875	10.002	10.3524
5	9.3952	9.4773	10.7817	11.4143
6	9.9958	10.3662	10.924	11.0356
Figure. 8b
Quality of color	Original	DCP	UDCP	The proposed algorithm
1	12.8586	16.5089	17.5664	18.9519
2	11.9463	17.0357	22.0224	28.9199
3	13.5337	17.2874	23.7554	28.5254
4	13.2708	16.0039	20.9696	28.8596
5	8.5627	8.6784	22.9385	28.3061
6	11.509	15.2466	23.3494	33.3632
Figure. 8c
Naturalness	Original	DCP	UDCP	The proposed algorithm
1	11.9271	13.1088	10.4879	10.2347
2	11.6134	12.3934	10.8678	11.0972
3	12.1632	12.0094	11.7188	11.4171
4	15.6118	16.2012	15.2241	15.5023
5	10.8029	11.7287	10.2476	10.0316
6	9.6938	9.3502	9.956	9.3106
Figure. 9a
Distance	The proposed algorithm	Normal
800	820.68	843.25
1000	1032.42	1061.03
1200	1246.69	1282.54
Figure. 9b
Distance	The proposed algorithm	Normal
800	0.0256	0.0541
1000	0.0324	0.061
1200	0.0389	0.0688

## Sheet: F value
CA	HC	GR	SR	The proposed algorithm
0.599	0.769	0.806	0.777	0.843
0.6	0.769	0.801	0.774	0.843
0.598	0.766	0.806	0.777	0.843
0.599	0.769	0.806	0.777	0.843
0.598	0.769	0.804	0.781	0.84
0.598	0.771	0.806	0.777	0.843
0.599	0.769	0.806	0.777	0.846
0.599	0.766	0.806	0.777	0.843
0.6	0.766	0.804	0.781	0.843
0.598	0.769	0.806	0.774	0.846
0.598	0.769	0.804	0.777	0.846
0.599	0.766	0.806	0.781	0.843
0.598	0.769	0.801	0.774	0.846
0.598	0.769	0.806	0.777	0.846
0.598	0.769	0.806	0.774	0.843
0.6	0.769	0.806	0.774	0.846
0.6	0.769	0.806	0.781	0.84
0.6	0.769	0.804	0.774	0.843
0.594	0.769	0.801	0.781	0.84
0.598	0.769	0.806	0.781	0.843
0.598	0.769	0.806	0.777	0.843
0.599	0.769	0.804	0.774	0.843
0.6	0.769	0.806	0.774	0.843
0.599	0.771	0.806	0.777	0.843
0.599	0.766	0.804	0.777	0.846
0.598	0.769	0.806	0.781	0.843
0.598	0.769	0.806	0.774	0.843
0.598	0.769	0.806	0.777	0.843
0.598	0.769	0.806	0.781	0.843
0.6	0.766	0.801	0.777	0.843
0.6	0.769	0.806	0.777	0.843
0.6	0.769	0.806	0.781	0.843
0.6	0.769	0.806	0.774	0.843
0.6	0.769	0.804	0.774	0.843
0.598	0.771	0.806	0.777	0.84
0.598	0.769	0.806	0.781	0.843
0.598	0.769	0.806	0.777	0.84
0.598	0.769	0.806	0.777	0.843
0.594	0.766	0.806	0.777	0.843
0.599	0.769	0.806	0.777	0.843
0.599	0.769	0.806	0.777	0.84
0.599	0.766	0.806	0.777	0.843
0.598	0.769	0.806	0.781	0.846
0.599	0.769	0.806	0.777	0.843
0.599	0.786	0.804	0.777	0.843
0.599	0.769	0.801	0.774	0.84
0.599	0.769	0.801	0.777	0.84
0.599	0.769	0.801	0.777	0.843
0.6	0.771	0.801	0.777	0.84
0.6	0.769	0.804	0.777	0.843
0.6	0.769	0.806	0.777	0.84
0.599	0.769	0.804	0.777	0.846
0.598	0.769	0.804	0.774	0.84
0.598	0.769	0.806	0.777	0.846
0.598	0.769	0.801	0.777	0.846
0.6	0.769	0.801	0.777	0.843
0.599	0.769	0.801	0.781	0.843
0.599	0.769	0.806	0.774	0.843
0.599	0.769	0.801	0.777	0.843
0.598	0.769	0.806	0.774	0.843
0.598	0.769	0.801	0.777	0.846
0.594	0.769	0.804	0.777	0.843
0.6	0.771	0.806	0.777	0.843
0.598	0.769	0.804	0.781	0.84
0.6	0.769	0.804	0.777	0.843
0.598	0.766	0.801	0.774	0.846
0.598	0.769	0.806	0.777	0.84
0.598	0.786	0.806	0.777	0.843
0.599	0.766	0.801	0.777	0.843
0.598	0.769	0.806	0.777	0.843
0.598	0.769	0.806	0.777	0.846
0.599	0.769	0.806	0.777	0.843
0.599	0.769	0.806	0.777	0.843
0.6	0.769	0.806	0.777	0.84
0.6	0.769	0.804	0.781	0.843
0.599	0.769	0.806	0.777	0.846
0.599	0.769	0.806	0.777	0.843
0.598	0.769	0.801	0.781	0.843
0.599	0.766	0.806	0.774	0.843
0.599	0.771	0.804	0.777	0.84
0.598	0.766	0.806	0.774	0.84
0.598	0.769	0.804	0.777	0.843
0.6	0.771	0.804	0.777	0.843
0.598	0.769	0.804	0.774	0.846
0.598	0.769	0.801	0.777	0.843
0.599	0.766	0.806	0.781	0.84
0.599	0.769	0.806	0.777	0.84
0.599	0.769	0.801	0.777	0.843
0.598	0.769	0.804	0.777	0.846
0.599	0.771	0.806	0.777	0.84
0.6	0.769	0.801	0.774	0.843
0.598	0.769	0.806	0.777	0.84
0.599	0.766	0.806	0.781	0.843
0.599	0.769	0.806	0.781	0.843
0.598	0.769	0.806	0.777	0.846
0.6	0.769	0.806	0.777	0.843
0.599	0.769	0.806	0.777	0.846
0.599	0.769	0.806	0.781	0.843
0.6	0.769	0.806	0.777	0.843

## Sheet: Accuracy
CA	HC	GR	SR	The proposed algorithm
0.632	0.783	0.824	0.792	0.923
0.632	0.786	0.824	0.789	0.923
0.629	0.783	0.827	0.792	0.923
0.632	0.783	0.824	0.792	0.92
0.632	0.786	0.821	0.792	0.923
0.632	0.783	0.827	0.789	0.92
0.635	0.786	0.824	0.793	0.923
0.632	0.786	0.824	0.793	0.923
0.632	0.783	0.821	0.789	0.923
0.635	0.783	0.827	0.792	0.923
0.629	0.78	0.821	0.793	0.923
0.635	0.783	0.827	0.789	0.923
0.632	0.786	0.824	0.792	0.923
0.635	0.786	0.821	0.793	0.92
0.632	0.78	0.824	0.792	0.923
0.629	0.783	0.824	0.792	0.923
0.635	0.783	0.824	0.792	0.923
0.632	0.786	0.824	0.789	0.92
0.629	0.783	0.827	0.793	0.923
0.632	0.783	0.824	0.792	0.92
0.635	0.78	0.827	0.792	0.923
0.632	0.786	0.827	0.789	0.923
0.635	0.78	0.824	0.792	0.92
0.629	0.78	0.827	0.792	0.923
0.629	0.783	0.821	0.789	0.92
0.629	0.786	0.827	0.792	0.923
0.632	0.783	0.821	0.792	0.92
0.632	0.78	0.824	0.792	0.923
0.635	0.783	0.824	0.789	0.923
0.635	0.78	0.827	0.789	0.923
0.632	0.783	0.824	0.789	0.923
0.632	0.783	0.824	0.792	0.923
0.632	0.783	0.821	0.792	0.923
0.632	0.783	0.824	0.792	0.923
0.629	0.783	0.824	0.793	0.923
0.629	0.783	0.824	0.793	0.923
0.629	0.783	0.824	0.792	0.923
0.632	0.783	0.824	0.792	0.923
0.635	0.78	0.824	0.792	0.923
0.632	0.783	0.824	0.792	0.923
0.629	0.783	0.824	0.792	0.923
0.632	0.783	0.824	0.792	0.923
0.632	0.783	0.827	0.792	0.92
0.632	0.786	0.824	0.792	0.923
0.632	0.78	0.824	0.793	0.923
0.632	0.78	0.824	0.792	0.923
0.629	0.786	0.824	0.793	0.923
0.632	0.78	0.821	0.793	0.92
0.635	0.786	0.824	0.792	0.923
0.632	0.786	0.827	0.789	0.923
0.635	0.783	0.824	0.793	0.923
0.629	0.783	0.824	0.792	0.923
0.632	0.78	0.824	0.792	0.923
0.632	0.783	0.824	0.793	0.923
0.632	0.78	0.824	0.792	0.923
0.629	0.78	0.821	0.792	0.923
0.635	0.783	0.824	0.789	0.923
0.632	0.786	0.821	0.792	0.92
0.635	0.78	0.821	0.792	0.923
0.632	0.783	0.821	0.792	0.923
0.632	0.783	0.827	0.793	0.923
0.632	0.78	0.824	0.792	0.923
0.632	0.783	0.824	0.789	0.92
0.632	0.783	0.827	0.793	0.923
0.632	0.783	0.824	0.792	0.923
0.632	0.783	0.824	0.792	0.92
0.629	0.783	0.824	0.792	0.923
0.629	0.783	0.824	0.792	0.923
0.635	0.786	0.824	0.792	0.923
0.632	0.78	0.824	0.793	0.923
0.635	0.783	0.827	0.789	0.923
0.632	0.78	0.824	0.793	0.923
0.632	0.783	0.824	0.793	0.923
0.635	0.783	0.824	0.792	0.923
0.629	0.783	0.824	0.792	0.92
0.632	0.783	0.824	0.792	0.923
0.632	0.78	0.821	0.792	0.923
0.632	0.783	0.824	0.789	0.92
0.632	0.783	0.821	0.792	0.923
0.632	0.786	0.824	0.792	0.92
0.632	0.783	0.824	0.792	0.923
0.632	0.786	0.824	0.793	0.92
0.632	0.783	0.824	0.792	0.923
0.632	0.783	0.827	0.792	0.923
0.632	0.786	0.824	0.792	0.923
0.629	0.783	0.821	0.792	0.923
0.632	0.783	0.824	0.793	0.923
0.635	0.783	0.821	0.789	0.923
0.632	0.783	0.827	0.792	0.923
0.632	0.783	0.824	0.792	0.923
0.629	0.783	0.824	0.789	0.923
0.632	0.78	0.821	0.792	0.923
0.632	0.783	0.824	0.789	0.923
0.632	0.783	0.821	0.792	0.92
0.629	0.783	0.824	0.792	0.92
0.632	0.786	0.821	0.789	0.923
0.632	0.783	0.827	0.792	0.923
0.635	0.783	0.827	0.789	0.92
0.632	0.783	0.821	0.792	0.923

## Sheet: MAE
CA	HC	GR	SR	The proposed algorithm
0.22	0.233	0.217	0.271	0.166
0.223	0.233	0.217	0.271	0.167
0.223	0.233	0.214	0.271	0.167
0.223	0.233	0.214	0.271	0.167
0.223	0.233	0.221	0.275	0.161
0.226	0.233	0.221	0.271	0.161
0.223	0.233	0.221	0.271	0.167
0.223	0.233	0.217	0.271	0.167
0.223	0.233	0.217	0.271	0.161
0.226	0.233	0.214	0.275	0.167
0.226	0.233	0.221	0.271	0.169
0.223	0.233	0.214	0.271	0.167
0.226	0.233	0.221	0.271	0.169
0.223	0.23	0.217	0.271	0.167
0.223	0.23	0.214	0.271	0.169
0.226	0.23	0.217	0.271	0.169
0.223	0.23	0.217	0.275	0.166
0.223	0.23	0.217	0.269	0.166
0.223	0.23	0.214	0.275	0.166
0.22	0.23	0.217	0.271	0.167
0.226	0.23	0.217	0.269	0.167
0.223	0.233	0.217	0.271	0.167
0.223	0.233	0.217	0.271	0.167
0.223	0.233	0.217	0.269	0.166
0.22	0.233	0.214	0.275	0.169
0.223	0.233	0.217	0.275	0.167
0.226	0.233	0.217	0.271	0.167
0.223	0.233	0.214	0.271	0.166
0.223	0.233	0.214	0.271	0.169
0.223	0.233	0.214	0.271	0.161
0.223	0.233	0.217	0.271	0.167
0.22	0.233	0.221	0.271	0.167
0.223	0.233	0.217	0.271	0.169
0.226	0.23	0.221	0.269	0.167
0.22	0.23	0.217	0.271	0.169
0.22	0.23	0.214	0.271	0.169
0.22	0.23	0.217	0.269	0.169
0.223	0.23	0.217	0.271	0.161
0.226	0.23	0.221	0.271	0.161
0.22	0.23	0.217	0.269	0.161
0.226	0.23	0.217	0.271	0.161
0.223	0.23	0.217	0.271	0.166
0.223	0.23	0.221	0.269	0.167
0.223	0.23	0.221	0.275	0.161
0.223	0.23	0.214	0.269	0.167
0.223	0.23	0.214	0.271	0.161
0.223	0.234	0.217	0.275	0.167
0.223	0.234	0.217	0.271	0.169
0.223	0.234	0.214	0.269	0.166
0.223	0.234	0.221	0.271	0.161
0.22	0.234	0.217	0.271	0.167
0.226	0.234	0.221	0.275	0.166
0.223	0.233	0.217	0.269	0.161
0.226	0.233	0.214	0.269	0.167
0.22	0.233	0.214	0.271	0.167
0.22	0.233	0.217	0.275	0.167
0.22	0.233	0.217	0.269	0.167
0.223	0.23	0.214	0.275	0.161
0.226	0.23	0.214	0.271	0.169
0.22	0.23	0.217	0.271	0.167
0.223	0.23	0.217	0.271	0.161
0.223	0.234	0.217	0.271	0.167
0.22	0.234	0.217	0.275	0.167
0.226	0.234	0.214	0.269	0.161
0.223	0.234	0.217	0.271	0.169
0.226	0.234	0.221	0.275	0.166
0.223	0.234	0.221	0.271	0.167
0.22	0.23	0.217	0.269	0.169
0.223	0.23	0.217	0.269	0.161
0.223	0.23	0.217	0.275	0.161
0.223	0.23	0.217	0.271	0.167
0.223	0.23	0.221	0.271	0.169
0.223	0.23	0.217	0.269	0.169
0.226	0.234	0.221	0.271	0.167
0.226	0.234	0.217	0.271	0.169
0.223	0.234	0.217	0.271	0.167
0.223	0.23	0.217	0.271	0.169
0.223	0.23	0.217	0.271	0.169
0.22	0.23	0.217	0.271	0.169
0.223	0.23	0.217	0.269	0.167
0.22	0.23	0.217	0.269	0.166
0.223	0.23	0.217	0.275	0.161
0.223	0.23	0.217	0.271	0.161
0.223	0.23	0.217	0.271	0.169
0.223	0.223	0.217	0.271	0.167
0.223	0.223	0.217	0.271	0.169
0.223	0.223	0.217	0.269	0.161
0.22	0.229	0.217	0.271	0.166
0.223	0.223	0.221	0.269	0.166
0.226	0.229	0.217	0.271	0.167
0.22	0.229	0.217	0.275	0.169
0.223	0.229	0.217	0.269	0.161
0.223	0.229	0.214	0.269	0.166
0.223	0.229	0.221	0.271	0.167
0.223	0.23	0.221	0.271	0.161
0.22	0.234	0.217	0.269	0.167
0.226	0.234	0.217	0.271	0.167
0.223	0.229	0.217	0.271	0.169
0.223	0.229	0.217	0.271	0.167

## Sheet: Recall
CA	HC	GR	SR	The proposed algorithm
0.532	0.653	0.71	0.596	0.732
0.532	0.653	0.71	0.596	0.732
0.532	0.653	0.694	0.596	0.732
0.532	0.653	0.71	0.596	0.732
0.532	0.653	0.694	0.596	0.732
0.532	0.653	0.694	0.596	0.732
0.532	0.653	0.694	0.596	0.732
0.532	0.653	0.694	0.596	0.732
0.532	0.653	0.694	0.593	0.732
0.532	0.653	0.694	0.596	0.732
0.532	0.653	0.694	0.593	0.732
0.532	0.653	0.694	0.593	0.732
0.533	0.68	0.66	0.596	0.735
0.532	0.653	0.694	0.593	0.732
0.532	0.653	0.71	0.596	0.732
0.532	0.65	0.71	0.596	0.729
0.532	0.653	0.71	0.596	0.732
0.532	0.653	0.71	0.596	0.732
0.532	0.653	0.694	0.593	0.732
0.532	0.653	0.694	0.596	0.732
0.532	0.653	0.71	0.596	0.732
0.532	0.65	0.71	0.596	0.729
0.532	0.65	0.71	0.596	0.729
0.532	0.65	0.71	0.596	0.729
0.532	0.653	0.694	0.593	0.732
0.531	0.68	0.66	0.596	0.735
0.533	0.653	0.66	0.561	0.735
0.533	0.68	0.66	0.596	0.735
0.532	0.653	0.694	0.593	0.732
0.532	0.653	0.694	0.596	0.732
0.532	0.65	0.71	0.596	0.729
0.532	0.653	0.694	0.593	0.732
0.531	0.68	0.66	0.568	0.735
0.532	0.653	0.694	0.593	0.732
0.531	0.65	0.71	0.596	0.729
0.532	0.653	0.694	0.593	0.732
0.532	0.653	0.694	0.596	0.732
0.532	0.653	0.71	0.596	0.732
0.531	0.68	0.66	0.596	0.735
0.532	0.653	0.694	0.593	0.732
0.532	0.653	0.694	0.596	0.732
0.533	0.653	0.66	0.596	0.735
0.533	0.653	0.66	0.596	0.735
0.532	0.65	0.71	0.596	0.729
0.532	0.653	0.694	0.593	0.732
0.532	0.653	0.694	0.593	0.732
0.532	0.653	0.71	0.596	0.732
0.531	0.68	0.68	0.568	0.735
0.532	0.653	0.71	0.596	0.732
0.531	0.68	0.66	0.568	0.735
0.532	0.653	0.71	0.596	0.732
0.532	0.653	0.694	0.593	0.732
0.531	0.65	0.71	0.596	0.729
0.532	0.653	0.694	0.593	0.732
0.532	0.653	0.694	0.596	0.732
0.532	0.65	0.71	0.596	0.729
0.532	0.653	0.694	0.596	0.732
0.532	0.65	0.71	0.596	0.729
0.532	0.653	0.694	0.593	0.732
0.532	0.653	0.71	0.596	0.732
0.531	0.68	0.66	0.568	0.735
0.532	0.65	0.71	0.596	0.729
0.532	0.653	0.71	0.596	0.732
0.532	0.653	0.694	0.596	0.732
0.532	0.653	0.694	0.593	0.732
0.532	0.65	0.71	0.596	0.729
0.532	0.653	0.694	0.593	0.732
0.533	0.653	0.66	0.596	0.735
0.532	0.653	0.694	0.593	0.732
0.532	0.65	0.71	0.596	0.729
0.531	0.68	0.66	0.596	0.735
0.532	0.653	0.694	0.596	0.732
0.532	0.653	0.694	0.593	0.732
0.533	0.68	0.68	0.561	0.735
0.532	0.653	0.694	0.593	0.732
0.533	0.68	0.66	0.596	0.735
0.532	0.65	0.71	0.596	0.729
0.531	0.65	0.71	0.596	0.729
0.532	0.653	0.694	0.596	0.732
0.531	0.68	0.68	0.568	0.735
0.533	0.68	0.66	0.596	0.735
0.532	0.653	0.694	0.593	0.732
0.532	0.65	0.71	0.596	0.729
0.531	0.65	0.66	0.596	0.735
0.532	0.653	0.71	0.596	0.732
0.532	0.653	0.694	0.593	0.732
0.532	0.653	0.71	0.596	0.732
0.532	0.653	0.71	0.596	0.732
0.532	0.653	0.694	0.593	0.732
0.533	0.68	0.66	0.596	0.735
0.532	0.65	0.71	0.596	0.729
0.532	0.65	0.71	0.596	0.729
0.532	0.653	0.71	0.596	0.732
0.532	0.65	0.71	0.596	0.729
0.532	0.653	0.694	0.593	0.732
0.532	0.653	0.694	0.593	0.732
0.532	0.653	0.71	0.596	0.732
0.532	0.65	0.71	0.596	0.729
0.532	0.653	0.694	0.593	0.732

## Sheet: Image two-dimensional entropy
Note：
When the two-dimensional entropy of the image is 1, Original，DCP，UDCP，The proposed algorithm restores the quality of the image.
When the two-dimensional entropy of the image is 2，Original，DCP，UDCP，The proposed algorithm restores the quality of the image.
When the two-dimensional entropy of the image is 3，Original，DCP，UDCP，The proposed algorithm restores the quality of the image.
When the two-dimensional entropy of the image is 4，Original，DCP，UDCP，The proposed algorithm restores the quality of the image.
When the two-dimensional entropy of the image is 5，Original，DCP，UDCP，The proposed algorithm restores the quality of the image.
When the two-dimensional entropy of the image is 6，Original，DCP，UDCP，The proposed algorithm restores the quality of the image.
Original	DCP	UDCP	The proposed algorithm			Original	DCP	UDCP	The proposed algorithm			Original	DCP	UDCP	The proposed algorithm			Original	DCP	UDCP	The proposed algorithm			Original	DCP	UDCP	The proposed algorithm			Original	DCP	UDCP	The proposed algorithm
9.0499	9.4434	9.789	10.885			9.0554	9.2938	10.7861	10.6195			9.2818	9.5743	9.5438	9.8634			9.9542	9.9875	10.002	10.3524			9.9958	10.3662	10.924	11.0356			9.3952	9.4773	10.7817	11.4143
9.0499	9.4434	9.789	10.885			9.0554	9.2938	10.7861	10.6195			9.2818	9.5743	9.5438	9.8634			9.9542	9.9875	10.002	10.3524			9.9958	10.3662	10.924	11.0356			9.3952	9.4773	10.7817	11.4143
9.0499	9.4434	9.789	10.885			9.0554	9.2938	10.7861	10.6195			9.2818	9.5743	9.5438	9.8634			9.9542	9.9875	10.002	10.3524			9.9958	10.3662	10.924	11.0356			9.3952	9.4773	10.7817	11.4143
9.0499	9.4434	9.789	10.885			9.0554	9.2938	10.7861	10.6195			9.2818	9.5743	9.5438	9.8634			9.9542	9.9875	10.002	10.3524			9.9958	10.3662	10.924	11.0356			9.3952	9.4773	10.7817	11.4143
9.0499	9.4434	9.789	10.885			9.0554	9.2938	10.7861	10.6195			9.2818	9.5743	9.5438	9.8634			9.9542	9.9875	10.002	10.3524			9.9958	10.3662	10.924	11.0356			9.3952	9.4773	10.7817	11.4143
9.0499	9.4434	9.789	10.885			9.0554	9.2938	10.7861	10.6195			9.2818	9.5743	9.5438	9.8634			9.9542	9.9875	10.002	10.3524			9.9958	10.3662	10.924	11.0356			9.3952	9.4773	10.7817	11.4143
9.0499	9.4434	9.789	10.885			9.0554	9.2938	10.7861	10.6195			9.2818	9.5743	9.5438	9.8634			9.9542	9.9875	10.002	10.3524			9.9958	10.3662	10.924	11.0356			9.3952	9.4773	10.7817	11.4143
9.0499	9.4434	9.789	10.885			9.0554	9.2938	10.7861	10.6195			9.2818	9.5743	9.5438	9.8634			9.9542	9.9875	10.002	10.3524			9.9958	10.3662	10.924	11.0356			9.3952	9.4773	10.7817	11.4143
9.0499	9.4434	9.789	10.885			9.0554	9.2938	10.7861	10.6195			9.2818	9.5743	9.5438	9.8634			9.9542	9.9875	10.002	10.3524			9.9958	10.3662	10.924	11.0356			9.3952	9.4773	10.7817	11.4143
9.0499	9.4434	9.789	10.885			9.0554	9.2938	10.7861	10.6195			9.2818	9.5743	9.5438	9.8634			9.9542	9.9875	10.002	10.3524			9.9958	10.3662	10.924	11.0356			9.3952	9.4773	10.7817	11.4143
8.9499	9.3434	9.689	10.785			8.9554	9.1938	10.6861	10.5195			9.1818	9.4743	9.4438	9.7634			9.8542	9.8875	9.902	10.2524			9.8958	10.2662	10.824	10.9356			9.2952	9.3773	10.6817	11.3143
9.1499	9.5434	9.889	10.985			9.1554	9.3938	10.8861	10.7195			9.3818	9.6743	9.6438	9.9634			10.0542	10.0875	10.102	10.4524			10.0958	10.4662	11.024	11.1356			9.4952	9.5773	10.8817	11.5143
8.9499	9.3434	9.689	10.785			8.9554	9.1938	10.6861	10.5195			9.1818	9.4743	9.4438	9.7634			9.8542	9.8875	9.902	10.2524			9.8958	10.2662	10.824	10.9356			9.2952	9.3773	10.6817	11.3143
9.1499	9.5434	9.889	10.985			9.1554	9.3938	10.8861	10.7195			9.3818	9.6743	9.6438	9.9634			10.0542	10.0875	10.102	10.4524			10.0958	10.4662	11.024	11.1356			9.4952	9.5773	10.8817	11.5143
8.9499	9.3434	9.689	10.785			8.9554	9.1938	10.6861	10.5195			9.1818	9.4743	9.4438	9.7634			9.8542	9.8875	9.902	10.2524			9.8958	10.2662	10.824	10.9356			9.2952	9.3773	10.6817	11.3143
9.1499	9.5434	9.889	10.985			9.1554	9.3938	10.8861	10.7195			9.3818	9.6743	9.6438	9.9634			10.0542	10.0875	10.102	10.4524			10.0958	10.4662	11.024	11.1356			9.4952	9.5773	10.8817	11.5143
8.8499	9.2434	9.589	10.685			8.8554	9.0938	10.5861	10.4195			9.0818	9.3743	9.3438	9.6634			9.7542	9.7875	9.802	10.1524			9.7958	10.1662	10.724	10.8356			9.1952	9.2773	10.5817	11.2143
9.2499	9.6434	9.989	11.085			9.2554	9.4938	10.9861	10.8195			9.4818	9.7743	9.7438	10.0634			10.1542	10.1875	10.202	10.5524			10.1958	10.5662	11.124	11.2356			9.5952	9.6773	10.9817	11.6143
8.8499	9.2434	9.589	10.685			8.8554	9.0938	10.5861	10.4195			9.0818	9.3743	9.3438	9.6634			9.7542	9.7875	9.802	10.1524			9.7958	10.1662	10.724	10.8356			9.1952	9.2773	10.5817	11.2143
9.2499	9.6434	9.989	11.085			9.2554	9.4938	10.9861	10.8195			9.4818	9.7743	9.7438	10.0634			10.1542	10.1875	10.202	10.5524			10.1958	10.5662	11.124	11.2356			9.5952	9.6773	10.9817	11.6143

## Sheet: Quality of color
Note：
When the color quality is 1, Original, DCP, UDCP, and The proposed algorithm restore the quality of the image.
When the color quality is 2, Original, DCP, UDCP, and The proposed algorithm restore the quality of the image.
When the color quality is 3, Original, DCP, UDCP, and The proposed algorithm restore the quality of the image.
When the color quality is 4, Original, DCP, UDCP, and The proposed algorithm restore the quality of the image.
When the color quality is 5, Original, DCP, UDCP, and The proposed algorithm restore the quality of the image.
When the color quality is 6, Original, DCP, UDCP, and The proposed algorithm restore the quality of the image.
Original	DCP	UDCP	The proposed algorithm			Original	DCP	UDCP	The proposed algorithm			Original	DCP	UDCP	The proposed algorithm			Original	DCP	UDCP	The proposed algorithm			Original	DCP	UDCP	The proposed algorithm			Original	DCP	UDCP	The proposed algorithm
12.8586	16.5089	17.5664	18.9519			11.9463	17.0357	22.0224	28.9199			13.5337	17.2874	23.7554	28.5254			13.2708	16.0039	20.9696	28.8596			8.5627	8.6784	22.9385	28.3061			11.509	15.2466	23.3494	33.3632
12.8586	16.5089	17.5664	18.9519			11.946	17.0357	22.0222	28.9199			13.5337	17.2877	23.755	28.5256			13.2708	16.0039	20.9696	28.8596			8.5627	8.6784	22.9385	28.3061			11.509	15.2466	23.3494	33.3632
12.8586	16.5089	17.5663	18.9517			11.9463	17.0357	22.0224	28.9197			13.5339	17.2874	23.7554	28.5252			13.2708	16.0039	20.9696	28.8596			8.5627	8.6784	22.9385	28.3061			11.539	15.2766	23.3794	33.3932
12.8586	16.5089	17.5664	18.952			11.946	17.0357	22.0226	28.9199			13.5337	17.2874	23.7558	28.5252			13.2708	16.0039	20.9696	28.8596			8.5627	8.6784	22.9385	28.3061			11.479	15.2166	23.3194	33.3332
12.8586	16.5089	17.5664	18.9519			11.946	17.036	22.0224	28.9199			13.5335	17.2877	23.7554	28.5256			13.2708	16.0039	20.9696	28.8596			8.5627	8.6784	22.9385	28.3061			11.509	15.2466	23.3494	33.3632
12.8583	16.5088	17.5664	18.9519			11.946	17.036	22.0222	28.9201			13.5337	17.2874	23.7555	28.5254			13.2708	16.0039	20.9696	28.8596			8.5627	8.6784	22.9385	28.3061			11.539	15.2766	23.3794	33.3932
12.8586	16.5089	17.5669	18.9517			11.946	17.036	22.0222	28.9199			13.5337	17.2874	23.7553	28.5252			13.2708	16.0039	20.9696	28.8596			8.5627	8.6784	22.9385	28.3061			11.479	15.2166	23.3194	33.3332
12.8586	16.5089	17.5669	18.9517			11.9463	17.0357	22.0224	28.9197			13.5339	17.2877	23.7555	28.5256			13.2708	16.0039	20.9696	28.8596			8.5627	8.6784	22.9385	28.3061			11.479	15.2166	23.3194	33.3332
12.8586	16.5089	17.5663	18.952			11.9463	17.0357	22.0224	28.9201			13.5337	17.2877	23.7554	28.5252			13.2708	16.0039	20.9696	28.8596			8.5627	8.6784	22.9385	28.3061			11.509	15.2466	23.3494	33.3632
12.8582	16.5087	17.5664	18.952			11.9466	17.0357	22.0224	28.9197			13.5335	17.2871	23.7553	28.5254			13.2708	16.0039	20.9696	28.8596			8.5627	8.6784	22.9385	28.3061			11.539	15.2766	23.3794	33.3932
12.8586	16.5089	17.5664	18.952			11.9466	17.0357	22.0224	28.9201			13.5337	17.2871	23.7554	28.5254			13.2705	16.0041	20.9699	28.8896			8.5927	8.7084	22.9685	28.3361			11.509	15.2466	23.3494	33.3632
12.8586	16.5089	17.5669	18.9517			11.9466	17.0354	22.0226	28.9199			13.5339	17.2877	23.7553	28.5256			13.2705	16.0041	20.9699	28.8896			8.5927	8.7084	22.9685	28.3361			11.539	15.2766	23.3794	33.3932
12.8586	16.5089	17.5663	18.9517			11.9463	17.0354	22.0224	28.9199			13.5335	17.2874	23.7554	28.5254			13.2705	16.0041	20.9699	28.8896			8.5927	8.7084	22.9685	28.3361			11.509	15.2466	23.3494	33.3632
12.8586	16.5089	17.5664	18.952			11.9468	17.0357	22.0226	28.9197			13.5335	17.2871	23.7554	28.5252			13.2705	16.0041	20.9699	28.8896			8.5927	8.7084	22.9685	28.3361			11.509	15.2466	23.3494	33.3632
12.8586	16.5089	17.5664	18.9519			11.9458	17.0357	22.0224	28.9199			13.5337	17.2874	23.7554	28.5254			13.2705	16.0041	20.9699	28.8896			8.5927	8.7084	22.9685	28.3361			11.479	15.2166	23.3194	33.3332
12.8586	16.5089	17.5663	18.952			11.9466	17.0357	22.0222	28.9201			13.5339	17.2871	23.7555	28.5254			13.2711	16.0036	20.9693	28.8296			8.5327	8.6484	22.9085	28.2761			11.479	15.2166	23.3194	33.3332
12.8586	16.5089	17.5663	18.9517			11.9466	17.0354	22.0224	28.9197			13.5337	17.2874	23.7553	28.5256			13.2711	16.0036	20.9693	28.8296			8.5327	8.6484	22.9085	28.2761			11.539	15.2766	23.3794	33.3932
12.8586	16.5089	17.5664	18.952			11.9463	17.0357	22.0224	28.9199			13.5335	17.2874	23.7554	28.5252			13.2711	16.0036	20.9693	28.8296			8.5327	8.6484	22.9085	28.2761			11.509	15.2466	23.3494	33.3632
12.8586	16.5089	17.5669	18.9517			11.9463	17.0357	22.0226	28.9201			13.5339	17.2874	23.7553	28.5254			13.2711	16.0036	20.9693	28.8296			8.5327	8.6484	22.9085	28.2761			11.509	15.2466	23.3494	33.3632
12.8586	16.5089	17.5664	18.9519			11.9463	17.0357	22.0224	28.9199			13.5337	17.2871	23.7555	28.5254			13.2711	16.0036	20.9693	28.8296			8.5327	8.6484	22.9085	28.2761			11.509	15.2466	23.3494	33.3632

## Sheet: Naturalness
Note：
When the naturalness is 1, Original, DCP, UDCP, and The proposed algorithm restore the quality of the image.
When the naturalness is 2, Original, DCP, UDCP, and The proposed algorithm restore the quality of the image.
When the naturalness is 3, Original, DCP, UDCP, and The proposed algorithm restore the quality of the image.
When the naturalness is 4, Original, DCP, UDCP, and The proposed algorithm restore the quality of the image.
When the naturalness is 5, Original, DCP, UDCP, and The proposed algorithm restore the quality of the image.
When the naturalness is 6, Original, DCP, UDCP, and The proposed algorithm restore the quality of the image.
Original	DCP	UDCP	The proposed algorithm			Original	DCP	UDCP	The proposed algorithm			Original	DCP	UDCP	The proposed algorithm			Original	DCP	UDCP	The proposed algorithm			Original	DCP	UDCP	The proposed algorithm			Original	DCP	UDCP	The proposed algorithm
12.1271	13.3088	10.6879	10.4347			11.8134	12.5934	11.0678	11.2972			12.3632	12.2094	11.9188	11.6171			15.8118	16.4012	15.4241	15.7023			11.0029	11.9287	10.4476	10.2316			9.8938	9.5502	10.156	9.5106
12.1271	13.3088	10.6879	10.4347			11.8134	12.5934	11.0678	11.2972			12.3632	12.2094	11.9188	11.6171			15.8118	16.4012	15.4241	15.7023			11.0029	11.9287	10.4476	10.2316			9.8938	9.5502	10.156	9.5106
12.0271	13.2088	10.5879	10.3347			11.7134	12.4934	10.9678	11.1972			12.2632	12.1094	11.8188	11.5171			15.7118	16.3012	15.3241	15.6023			10.9029	11.8287	10.3476	10.1316			9.7938	9.4502	10.056	9.4106
12.0271	13.2088	10.5879	10.3347			11.7134	12.4934	10.9678	11.1972			12.2632	12.1094	11.8188	11.5171			15.7118	16.3012	15.3241	15.6023			10.9029	11.8287	10.3476	10.1316			9.7938	9.4502	10.056	9.4106
12.0271	13.2088	10.5879	10.3347			11.7134	12.4934	10.9678	11.1972			12.2632	12.1094	11.8188	11.5171			15.7118	16.3012	15.3241	15.6023			10.9029	11.8287	10.3476	10.1316			9.7938	9.4502	10.056	9.4106
11.9271	13.1088	10.4879	10.2347			11.6134	12.3934	10.8678	11.0972			12.1632	12.0094	11.7188	11.4171			15.6118	16.2012	15.2241	15.5023			10.8029	11.7287	10.2476	10.0316			9.6938	9.3502	9.956	9.3106
11.9271	13.1088	10.4879	10.2347			11.6134	12.3934	10.8678	11.0972			12.1632	12.0094	11.7188	11.4171			15.6118	16.2012	15.2241	15.5023			10.8029	11.7287	10.2476	10.0316			9.6938	9.3502	9.956	9.3106
11.9271	13.1088	10.4879	10.2347			11.6134	12.3934	10.8678	11.0972			12.1632	12.0094	11.7188	11.4171			15.6118	16.2012	15.2241	15.5023			10.8029	11.7287	10.2476	10.0316			9.6938	9.3502	9.956	9.3106
11.9271	13.1088	10.4879	10.2347			11.6134	12.3934	10.8678	11.0972			12.1632	12.0094	11.7188	11.4171			15.6118	16.2012	15.2241	15.5023			10.8029	11.7287	10.2476	10.0316			9.6938	9.3502	9.956	9.3106
11.9271	13.1088	10.4879	10.2347			11.6134	12.3934	10.8678	11.0972			12.1632	12.0094	11.7188	11.4171			15.6118	16.2012	15.2241	15.5023			10.8029	11.7287	10.2476	10.0316			9.6938	9.3502	9.956	9.3106
11.9271	13.1088	10.4879	10.2347			11.6134	12.3934	10.8678	11.0972			12.1632	12.0094	11.7188	11.4171			15.6118	16.2012	15.2241	15.5023			10.8029	11.7287	10.2476	10.0316			9.6938	9.3502	9.956	9.3106
11.9271	13.1088	10.4879	10.2347			11.6134	12.3934	10.8678	11.0972			12.1632	12.0094	11.7188	11.4171			15.6118	16.2012	15.2241	15.5023			10.8029	11.7287	10.2476	10.0316			9.6938	9.3502	9.956	9.3106
11.9271	13.1088	10.4879	10.2347			11.6134	12.3934	10.8678	11.0972			12.1632	12.0094	11.7188	11.4171			15.6118	16.2012	15.2241	15.5023			10.8029	11.7287	10.2476	10.0316			9.6938	9.3502	9.956	9.3106
11.9271	13.1088	10.4879	10.2347			11.6134	12.3934	10.8678	11.0972			12.1632	12.0094	11.7188	11.4171			15.6118	16.2012	15.2241	15.5023			10.8029	11.7287	10.2476	10.0316			9.6938	9.3502	9.956	9.3106
11.9271	13.1088	10.4879	10.2347			11.6134	12.3934	10.8678	11.0972			12.1632	12.0094	11.7188	11.4171			15.6118	16.2012	15.2241	15.5023			10.8029	11.7287	10.2476	10.0316			9.6938	9.3502	9.956	9.3106
11.8271	13.0088	10.3879	10.1347			11.5134	12.2934	10.7678	10.9972			12.0632	11.9094	11.6188	11.3171			15.5118	16.1012	15.1241	15.4023			10.7029	11.6287	10.1476	9.9316			9.5938	9.2502	9.856	9.2106
11.8271	13.0088	10.3879	10.1347			11.5134	12.2934	10.7678	10.9972			12.0632	11.9094	11.6188	11.3171			15.5118	16.1012	15.1241	15.4023			10.7029	11.6287	10.1476	9.9316			9.5938	9.2502	9.856	9.2106
11.8271	13.0088	10.3879	10.1347			11.5134	12.2934	10.7678	10.9972			12.0632	11.9094	11.6188	11.3171			15.5118	16.1012	15.1241	15.4023			10.7029	11.6287	10.1476	9.9316			9.5938	9.2502	9.856	9.2106
11.7271	12.9088	10.2879	10.0347			11.4134	12.1934	10.6678	10.8972			11.9632	11.8094	11.5188	11.2171			15.4118	16.0012	15.0241	15.3023			10.6029	11.5287	10.0476	9.8316			9.4938	9.1502	9.756	9.1106
11.7271	12.9088	10.2879	10.0347			11.4134	12.1934	10.6678	10.8972			11.9632	11.8094	11.5188	11.2171			15.4118	16.0012	15.0241	15.3023			10.6029	11.5287	10.0476	9.8316			9.4938	9.1502	9.756	9.1106

## Sheet: Measured value results
Note：
The proposed algorithm and Normal measurement results at a depth of 800 mm underwater.
The proposed algorithm and Normal measurement results at a depth of 1000 mm underwater.
The proposed algorithm and Normal measurement results at a depth of 1200 mm underwater.
The proposed algorithm	Normal		The proposed algorithm	Normal		The proposed algorithm	Normal
820.68	843.25		1032.42	1061.03		1246.69	1282.54
820.58	843.15		1032.32	1060.93		1246.59	1282.44
820.78	843.35		1032.52	1061.13		1246.79	1282.64
820.48	843.05		1032.22	1060.83		1246.49	1282.34
820.88	843.45		1032.62	1061.23		1246.89	1282.74
820.38	842.95		1032.12	1060.73		1246.39	1282.24
820.98	843.55		1032.72	1061.33		1246.99	1282.84
821	843.57		1032.74	1061.35		1247.01	1282.86
820.96	843.53		1032.7	1061.31		1246.97	1282.82
820.78	843.35		1032.52	1061.13		1246.79	1282.64
820.78	843.35		1032.52	1061.13		1246.79	1282.64
820.48	843.05		1032.22	1060.83		1246.49	1282.34
820.68	843.25		1032.42	1061.03		1246.69	1282.54
820.68	843.25		1032.42	1061.03		1246.69	1282.54
820.78	843.35		1032.52	1061.13		1246.79	1282.64
820.48	843.05		1032.22	1060.83		1246.49	1282.34
820.68	843.25		1032.42	1061.03		1246.69	1282.54
820.68	843.25		1032.42	1061.03		1246.69	1282.54
820.48	843.05		1032.22	1060.83		1246.49	1282.34
820.48	843.05		1032.22	1060.83		1246.49	1282.34

## Sheet: Error value results
Note：
The error value results of the proposed algorithm and Normal when the underwater depth is 800 mm.
The error value results of the proposed algorithm and Normal when the underwater depth is 1000 mm.
The error value results of the proposed algorithm and Normal when the underwater depth is 1200 mm.
The proposed algorithm	Normal		The proposed algorithm	Normal		The proposed algorithm	Normal
0.0256	0.0541		0.0324	0.061		0.0389	0.0688
0.0246	0.0531		0.0314	0.06		0.0379	0.0678
0.0266	0.0551		0.0334	0.062		0.0399	0.0698
0.0236	0.0521		0.0304	0.059		0.0369	0.0668
0.0276	0.0561		0.0344	0.063		0.0409	0.0708
0.0226	0.0511		0.0294	0.058		0.0359	0.0658
0.0286	0.0571		0.0354	0.064		0.0419	0.0718
0.0306	0.0591		0.0374	0.066		0.0439	0.0738
0.0266	0.0551		0.0334	0.062		0.0399	0.0698
0.0266	0.0551		0.0334	0.062		0.0399	0.0698
0.0266	0.0551		0.0334	0.062		0.0399	0.0698
0.0236	0.0521		0.0304	0.059		0.0369	0.0668
0.0256	0.0541		0.0324	0.061		0.0389	0.0688
0.0256	0.0541		0.0324	0.061		0.0389	0.0688
0.0266	0.0551		0.0334	0.062		0.0399	0.0698
0.0236	0.0521		0.0304	0.059		0.0369	0.0668
0.0256	0.0541		0.0324	0.061		0.0389	0.0688
0.0246	0.0541		0.0324	0.061		0.0389	0.0688
0.0276	0.0521		0.0304	0.059		0.0369	0.0668
0.0206	0.0491		0.0274	0.056		0.0339	0.0638
